# Supplementary material for: Safety and Perioperative Outcomes of Laparoscopic vs. Open Hepatectomy of Central-Located Liver Lesions: A Multicenter, Propensity Score-Matched, Retrospective Cohort Study
Source: MDPI journal article supplement (doi:10.3390/jcm12062164), 2023-03-10
Supplement: s1 [file s1]

# Safety and perioperative outcomes of laparoscopic vs. open hepatectomy of central-located liver lesions: A multicenter, propensity score-matched, retrospective cohort study

Bao Jin<sup>1#</sup>, Mui Yang<sup>2#</sup>, Yinhan Wang<sup>1,3#</sup>, Gang Xu<sup>1,4</sup>, Yuxin Wang<sup>1</sup>, Yuke Zhang<sup>1,3</sup>, Yitong Liu<sup>1,3</sup>, Xinming Niu<sup>1,3</sup>, Xiao Liu<sup>1</sup>, Xueshuai Wan<sup>1</sup>, Huayu Yang<sup>1</sup>, Xin Lu<sup>1</sup>, Xinting Sang<sup>1</sup>, Yilei Mao<sup>1</sup>, Zhixian Hong<sup>2\*</sup>, Shunda Du<sup>1\*</sup>

<sup>1</sup> Department of Liver Surgery, Peking Union Medical College (PUMC) Hospital, PUMC & Chinese Academy of Medical Sciences, Dongcheng, Beijing, 100730, China.

<sup>2</sup> Department of Hepatobiliary Surgery, Fifth Medical Center of Chinese PLA General Hospital, Fengtai, Beijing, 100039, China.

<sup>3</sup> Peking Union Medical College (PUMC), Chinese Academy of Medical Sciences & PUMC, Dongcheng, Beijing, 100730, China.

<sup>4</sup> Department of Liver Surgery and Liver Transplantation Centre, West China Hospital, Sichuan University, Chengdu, Sichuan Province, 610041, China.

<sup>#</sup> These authors contributed equally to the article.

\* Correspondence:

Zhixian Hong Email: [zqyhzx@sina.com](mailto:zqyhzx@sina.com)

Shunda Du E-mail: [dushd@pumch.cn](mailto:dushd@pumch.cn)

Supplementary Table 1 Reported studies of laparoscopic mesohepatectomy

| No. | First author    | Year | Country | Type                       | Sample size | Type of lesion                                 | Tumor size (cm) | Operation time (min) | EBL (ml)     | POS (days) | Morbidity/mortality rate | Ref  |
|-----|-----------------|------|---------|----------------------------|-------------|------------------------------------------------|-----------------|----------------------|--------------|------------|--------------------------|------|
| 1   | M A Machado     | 2011 | Brazil  | Case report                | 1           | colorectal liver metastasis                    | NR              | 200 min              | minimum      | 5          | 0                        | [14] |
| 2   | Claudius Conrad | 2015 | France  | Retrospective cohort study | 32          | 31 with malignancies, 1 with liver adenoma     | NR              | 253 min (SD 94)      | 403 (SD 475) | 10.4 days  | 44%/0                    | [12] |
| 3   | Wan-Joon Kim    | 2017 | Korea   | Case series                | 10          | 8 with HCC, 2 with colorectal liver metastasis | 2.9±1.9         | 330±92.7             | 325±234.5    | 9.5±3.4    | 10%/0                    | [22] |
| 4*  | Wei Li          | 2019 | China   | Retrospective              | 96/32       | HCC                                            | 5.7±3.0         | 175.0±37.3           | 395.8±       | 12.8±      | 0.3%/0,                  | [13] |

|   |                   |      |        | cohort control |    |              | /4.0 ± 2. | /173.3 ± 55. | 361.9/   | 5.1/10.   | 21.5%/14.6 |      |
|---|-------------------|------|--------|----------------|----|--------------|-----------|--------------|----------|-----------|------------|------|
|   |                   |      |        | study          |    |              | 0         | 1            | 328.2 ±  | 8 ± 4.1   | %          |      |
|   |                   |      |        |                |    |              |           |              | 328.0    |           |            |      |
| 5 | S W Zhu           | 2019 | China  | Case series    | 40 | Malignancies | 6.2 ± 2.9 | 333 ± 30     | 173 ± 12 | 10.7 ± 2. | 7.5%/0     | [15] |
|   |                   |      |        |                |    |              |           |              | 9        | 7         |            |      |
| 6 | Giammauro Berardi | 2019 | Japan  | Case report    | 1  | HCC          | 3         | 420          | 261      | 8         | 0/0        | [21] |
|   | Carolijn          |      |        |                |    |              |           |              |          |           |            |      |
| 7 | Antoine           | 2021 | France | Case report    | 1  | HCC          | 7         | NR           | NR       | 8         | 0/0        | [10] |
|   | Camerlo           |      |        |                |    |              |           |              |          |           |            |      |
| 8 | Rui Chen          | 2021 | China  | Case report    | 1  | HCC          | 13        | 360          | 200      | 8         | 0/0        | [11] |

EBL, estimated blood loss; POS, post-operative hospital stay.

\*The two sets of data in the fourth study (Wei Li, 2019) represent the open group (front) and the laparoscopy group (rear), respectively.
